# Supplementary material for: A Modular and Cost-Effective Droplet Microfluidic Device for Controlled Emulsion Production
Source: Polymers (Basel). 2024 Mar 11;16(6):765. doi: 10.3390/polym16060765 (PMC10974562; doi:10.3390/polym16060765)
Supplement: Supplementary file 1 [file polymers-16-00765-s001.zip]

Archive with 5 entries (5 files):
- polymers-2814764-supplementary.pdf
- Video-S1.mp4
- Video-S2.mp4
- Video-S3.mp4
- Video-S4.mp4
